# Supplementary material for: Design and synthesis of plasticizing fillers based on zirconium phosphonates for glycerol-free composite starch films
Source: Royal Society of Chemistry journal article supplement (doi:10.1039/c2jm15201k), 2012-01-01
Supplement: c2jm15201k.pdf [file c2jm15201k.pdf]

# Design and Synthesis of Plasticizing Fillers Based on Zirconium Phosphonates for Glycerol-Free Composite Starch Films

*Anna Donnadio, Monica Pica, Marco Taddei, and Riccardo Vivani*

## Electronic Supplementary Information

Table S1: Fractional atomic coordinates and isotropic atomic displacement parameters for ZC3.

| Atom | <i>x/a</i> | <i>y/b</i> | <i>z/c</i> | <i>U</i> <sub>iso</sub> ×100 |
|------|------------|------------|------------|------------------------------|
| Zr   | 0.0872(3)  | 0.7389(5)  | 0.4533(3)  | 1.51(7)                      |
| P1   | 0.8304(5)  | 0.9137(9)  | 0.9079(8)  | 1.51                         |
| P2   | 0.9114(7)  | 0.5030(8)  | 0.8078(8)  | 1.51                         |
| O1   | 0.744(1)   | 0.851(2)   | 0.996(2)   | 1.51                         |
| O2   | 0.856(1)   | 1.085(1)   | 0.915(1)   | 1.51                         |
| O3   | 0.9374(9)  | 0.846(2)   | 0.957(1)   | 1.51                         |
| O4   | 1.024(1)   | 0.609(2)   | 0.822(1)   | 1.51                         |
| O5   | 0.907(1)   | 0.420(2)   | 0.680(1)   | 1.51                         |
| O6   | 0.922(1)   | 0.380(2)   | 0.913(1)   | 1.51                         |
| F    | 0.2243(9)  | 0.824(2)   | 0.414(1)   | 1.51                         |
| C1   | 0.792(1)   | 0.858(2)   | 0.740(1)   | 1.51                         |
| C2   | 0.779 (1)  | 0.606(2)   | 0.832(2)   | 1.51                         |
| N    | 0.737(1)   | 0.705(2)   | 0.728(1)   | 1.51                         |
| C3   | 0.618(1)   | 0.725(3)   | 0.744(2)   | 1.51                         |
| C4   | 0.548(1)   | 0.805(2)   | 0.634(2)   | 1.51                         |
| C5   | 0.434(2)   | 0.730(3)   | 0.624(1)   | 1.51                         |
| O7   | 0.412(1)   | 0.706(2)   | 0.753(2)   | 1.51                         |

Table S2: Bond lengths (Å) and angles (°) for ZC3.

|              |          |              |          |
|--------------|----------|--------------|----------|
| Zr - O2      | 2.04(1)  | P2 - O6      | 1.57(1)  |
| Zr - O3      | 2.01(1)  | P2 - C2      | 1.93(1)  |
| Zr - O4      | 2.05(1)  | N - C1       | 1.52(1)  |
| Zr - O5      | 2.03(1)  | N - C2       | 1.47(1)  |
| Zr - O6      | 1.94(1)  | N - C3       | 1.52(1)  |
| Zr - F       | 1.96(1)  | C3 - C4      | 1.56(3)  |
| P1 - O1      | 1.63(1)  | C4 - C5      | 1.56(3)  |
| P1 - O2      | 1.56(1)  | C5 - O7      | 1.48(1)  |
| P1 - O3      | 1.49(1)  |              |          |
| P1 - C1      | 1.90(1)  | O1...N       | 2.58(2)  |
| P2 - O4      | 1.67(1)  | O7...F       | 3.09(2)  |
| P2 - O5      | 1.57(1)  |              |          |
| O2 - Zr - O3 | 88.2(5)  | O2 - P1 - O3 | 102.6(7) |
| O2 - Zr - O4 | 177.7(7) | O2 - P1 - C1 | 109.3(7) |
| O2 - Zr - O5 | 89.4(6)  | O3 - P1 - C1 | 109.9(7) |
| O2 - Zr - O6 | 87.7(6)  | O4 - P2 - O5 | 106.4(7) |
| O2 - Zr - F  | 100.6(6) | O4 - P2 - O6 | 109.8(7) |
| O3 - Zr - O4 | 89.5(6)  | O4 - P2 - C2 | 115.5(7) |
| O3 - Zr - O5 | 82.6(6)  | O5 - P2 - O6 | 107.4(7) |
| O3 - Zr - O6 | 94.9(6)  | O5 - P2 - C2 | 114.4(7) |
| O3 - Zr - F  | 168.5(7) | O6 - P2 - C2 | 103.0(7) |
| O4 - Zr - O5 | 90.7(7)  | P1 - C1 - N  | 111.8(7) |
| O4 - Zr - O6 | 92.1(5)  | P2 - C2 - N  | 114.0(8) |
| O4 - Zr - F  | 81.7(6)  | C1 - N - C2  | 111.3(8) |
| O5 - Zr - O6 | 176.3(8) | C1 - N - C3  | 108.4(9) |
| O5 - Zr - F  | 90.0(6)  | C2 - N - C3  | 103.5(8) |
| O6 - Zr - F  | 92.9(6)  | N - C3 - C4  | 114.5(8) |
| O1 - P1 - O2 | 116.8(7) | C3 - C4 - C5 | 104.7(8) |
| O1 - P1 - O3 | 105.8(7) | C4 - C5 - O7 | 105.5(8) |
| O1 - P1 - C1 | 111.9(7) |              |          |

Table S3: Fractional atomic coordinates and isotropic atomic displacement parameters for ZC4a.

| Atom | x/a       | y/b        | z/c       | U <sub>iso</sub> ×100 |
|------|-----------|------------|-----------|-----------------------|
| Zr   | 0.0837(4) | -0.2374(8) | 0.5914(8) | 3.3(2)                |
| P1   | 0.080(1)  | 0.013(1)   | 0.837(1)  | 3.3                   |
| P2   | 0.1695(8) | 0.420(1)   | 0.981(1)  | 3.3                   |
| O1   | 0.092(2)  | -0.075(3)  | 0.724(3)  | 3.3                   |
| O2   | -0.028(2) | 0.101(3)   | 0.800(3)  | 3.3                   |
| O3   | 0.075(2)  | -0.102(3)  | 0.947(2)  | 3.3                   |
| O4   | 0.247(2)  | 0.358(3)   | 1.099(3)  | 3.3                   |
| O5   | 0.063(1)  | 0.352(3)   | 0.969(3)  | 3.3                   |
| O6   | 0.166(2)  | 0.587(2)   | 1.008(3)  | 3.3                   |
| F    | 0.227(1)  | -0.293(3)  | 0.690(2)  | 3.3                   |
| C1   | 0.193(2)  | 0.145(3)   | 0.899(2)  | 3.3                   |
| C2   | 0.218(2)  | 0.377(2)   | 0.832(3)  | 3.3                   |
| N    | 0.241(1)  | 0.220(2)   | 0.807(2)  | 3.3                   |
| C3   | 0.360(2)  | 0.194(3)   | 0.845(4)  | 3.3                   |
| C4   | 0.425(2)  | 0.342(3)   | 0.836(5)  | 3.3                   |
| C5   | 0.542(2)  | 0.319(4)   | 0.837(3)  | 3.3                   |
| C6   | 0.567(3)  | 0.443(3)   | 0.741(3)  | 3.3                   |
| O7   | 0.567(2)  | 0.388(3)   | 0.611(3)  | 3.3                   |

Table S4: Bond lengths (Å) and angles (°) for ZC4a.

|              |          |              |         |
|--------------|----------|--------------|---------|
| Zr - O1      | 2.02(2)  | P2 - O6      | 1.52(2) |
| Zr - O2      | 2.13(2)  | P2 - C2      | 1.95(2) |
| Zr - O3      | 2.11(2)  | N - C1       | 1.50(3) |
| Zr - O5      | 2.06(2)  | N - C2       | 1.48(3) |
| Zr - O6      | 2.10(2)  | N - C3       | 1.55(3) |
| Zr - F       | 1.98(2)  | C3 - C4      | 1.60(4) |
| P1 - O1      | 1.50(2)  | C4 - C5      | 1.59(4) |
| P1 - O2      | 1.60(2)  | C5 - C6      | 1.62(5) |
| P1 - O3      | 1.59(2)  | C6 - O7      | 1.50(4) |
| P1 - C1      | 1.89(2)  |              |         |
| P2 - O4      | 1.51(2)  | O4...N       | 2.38(3) |
| P2 - O5      | 1.52(2)  | O7...F       | 3.40(1) |
|              |          |              |         |
| O1 - Zr - O2 | 93(2)    | O2 - P1 - O3 | 106(1)  |
| O1 - Zr - O3 | 177(2)   | O2 - P1 - C1 | 111(1)  |
| O1 - Zr - O5 | 78(1)    | O3 - P1 - C1 | 110(1)  |
| O1 - Zr - O6 | 85(1)    | O4 - P2 - O5 | 110(1)  |
| O1 - Zr - F  | 87.2(9)  | O4 - P2 - O6 | 104(1)  |
| O2 - Zr - O3 | 89.9(9)  | O4 - P2 - C2 | 109(1)  |
| O2 - Zr - O5 | 89(1)    | O5 - P2 - O6 | 109(1)  |
| O2 - Zr - O6 | 169(1)   | O5 - P2 - C2 | 112(1)  |
| O2 - Zr - F  | 89(1)    | O6 - P2 - C2 | 113(1)  |
| O3 - Zr - O5 | 100(1)   | P1 - C1 - N  | 120(1)  |
| O3 - Zr - O6 | 92(1)    | P2 - C2 - N  | 118(1)  |
| O3 - Zr - F  | 94(1)    | C1 - N - C2  | 99(2)   |
| O5 - Zr - O6 | 100.9(8) | C1 - N - C3  | 112(1)  |
| O5 - Zr - F  | 165(1)   | C2 - N - C3  | 110(1)  |
| O6 - Zr - F  | 80.8(9)  | N - C3 - C4  | 114(1)  |
| O1 - P1 - O2 | 111(1)   | C3 - C4 - C5 | 117(1)  |
| O1 - P1 - O3 | 108(1)   | C4 - C5 - C6 | 107(3)  |
| O1 - P1 - C1 | 111(1)   | C5 - C6 - O7 | 116(1)  |

Table S5: Fractional atomic coordinates and isotropic atomic displacement parameters for ZC5.

| Atom | x/a       | y/b      | z/c       | <i>U</i> <sub>iso</sub> ×100 |
|------|-----------|----------|-----------|------------------------------|
| Zr   | 0.0768(6) | 0.764(1) | 0.4400(6) | 1.8(2)                       |
| P1   | 0.151(1)  | 0.120(2) | 0.560(2)  | 1.8                          |
| P2   | 0.063(1)  | 0.495(2) | 0.684(2)  | 1.8                          |
| O1   | 0.103(2)  | 0.947(2) | 0.553(2)  | 1.8                          |
| O2   | 0.060(1)  | 0.202(3) | 0.544(2)  | 1.8                          |
| O3   | 0.214(2)  | 0.210(4) | 0.470(3)  | 1.8                          |
| O4   | 0.075(2)  | 0.590(3) | 0.803(2)  | 1.8                          |
| O5   | 0.069(2)  | 0.624(3) | 0.584(2)  | 1.8                          |
| O6   | -0.046(2) | 0.412(3) | 0.677(2)  | 1.8                          |
| F    | 0.200(1)  | 0.722(3) | 0.424(2)  | 1.8                          |
| C1   | 0.202(2)  | 0.142(4) | 0.723(3)  | 1.8                          |
| C2   | 0.173(2)  | 0.382(4) | 0.641(3)  | 1.8                          |
| N    | 0.223(2)  | 0.301(4) | 0.741(3)  | 1.8                          |
| C3   | 0.329(3)  | 0.336(4) | 0.745(4)  | 1.8                          |
| C4   | 0.394(3)  | 0.187(5) | 0.742(4)  | 1.8                          |
| C5   | 0.468(3)  | 0.195(5) | 0.846(5)  | 1.8                          |
| C6   | 0.506(4)  | 0.355(5) | 0.849(5)  | 1.8                          |
| C7   | 0.599(3)  | 0.352(5) | 0.923(6)  | 1.8                          |
| O7   | 0.631(2)  | 0.206(4) | 0.914(4)  | 1.8                          |

Table S6: Bond lengths (Å) and angles (°) for ZC5.

|              |         |              |         |
|--------------|---------|--------------|---------|
| Zr - O1      | 2.06(2) | P2 - C2      | 1.96(2) |
| Zr - O2      | 2.02(2) | N - C1       | 1.46(5) |
| Zr - O4      | 1.98(2) | N - C2       | 1.46(2) |
| Zr - O5      | 2.01(2) | N - C3       | 1.56(5) |
| Zr - O6      | 2.04(2) | C3 - C4      | 1.63(6) |
| Zr - F       | 1.84(2) | C4 - C5      | 1.51(7) |
| P1 - O1      | 1.69(2) | C5 - C6      | 1.53(6) |
| P1 - O2      | 1.52(2) | C6 - C7      | 1.52(8) |
| P1 - O3      | 1.60(2) | C7 - O7      | 1.38(6) |
| P1 - C1      | 1.88(2) |              |         |
| P2 - O4      | 1.55(2) | O3...N       | 2.50(3) |
| P2 - O5      | 1.59(2) | O7...F       | 2.92(4) |
| P2 - O6      | 1.74(2) |              |         |
| O1 - Zr - O2 | 88.3(9) | O2 - P1 - C1 | 110(2)  |
| O1 - Zr - O4 | 85.7(9) | O3 - P1 - C1 | 109(1)  |
| O1 - Zr - O5 | 92(1)   | O4 - P2 - O5 | 100(1)  |
| O1 - Zr - O6 | 177(1)  | O4 - P2 - O6 | 108(1)  |
| O1 - Zr - F  | 94(1)   | O4 - P2 - C2 | 116(1)  |
| O2 - Zr - O4 | 90.3(9) | O5 - P2 - O6 | 112(1)  |
| O2 - Zr - O5 | 85.3(1) | O5 - P2 - C2 | 97(1)   |
| O2 - Zr - O6 | 89.9(9) | O6 - P2 - C2 | 122(1)  |
| O2 - Zr - F  | 177(1)  | P1 - C1 - N  | 107(1)  |
| O4 - Zr - O5 | 175(1)  | P2 - C2 - N  | 116(2)  |
| O4 - Zr - O6 | 92(1)   | C1 - N - C2  | 107(2)  |
| O4 - Zr - F  | 92(1)   | C1 - N - C3  | 113(2)  |
| O5 - Zr - O6 | 89.7(9) | C2 - N - C3  | 111(2)  |
| O5 - Zr - F  | 93(1)   | N - C3 - C4  | 114(2)  |
| O6 - Zr - F  | 88(1)   | C3 - C4 - C5 | 110(2)  |
| O1 - P1 - O2 | 95(1)   | C4 - C5 - C6 | 107(4)  |
| O1 - P1 - O3 | 133(2)  | C5 - C6 - C7 | 108(4)  |
| O1 - P1 - C1 | 106(1)  | C6 - C7 - O7 | 106(4)  |
| O2 - P1 - O3 | 102(1)  |              |         |

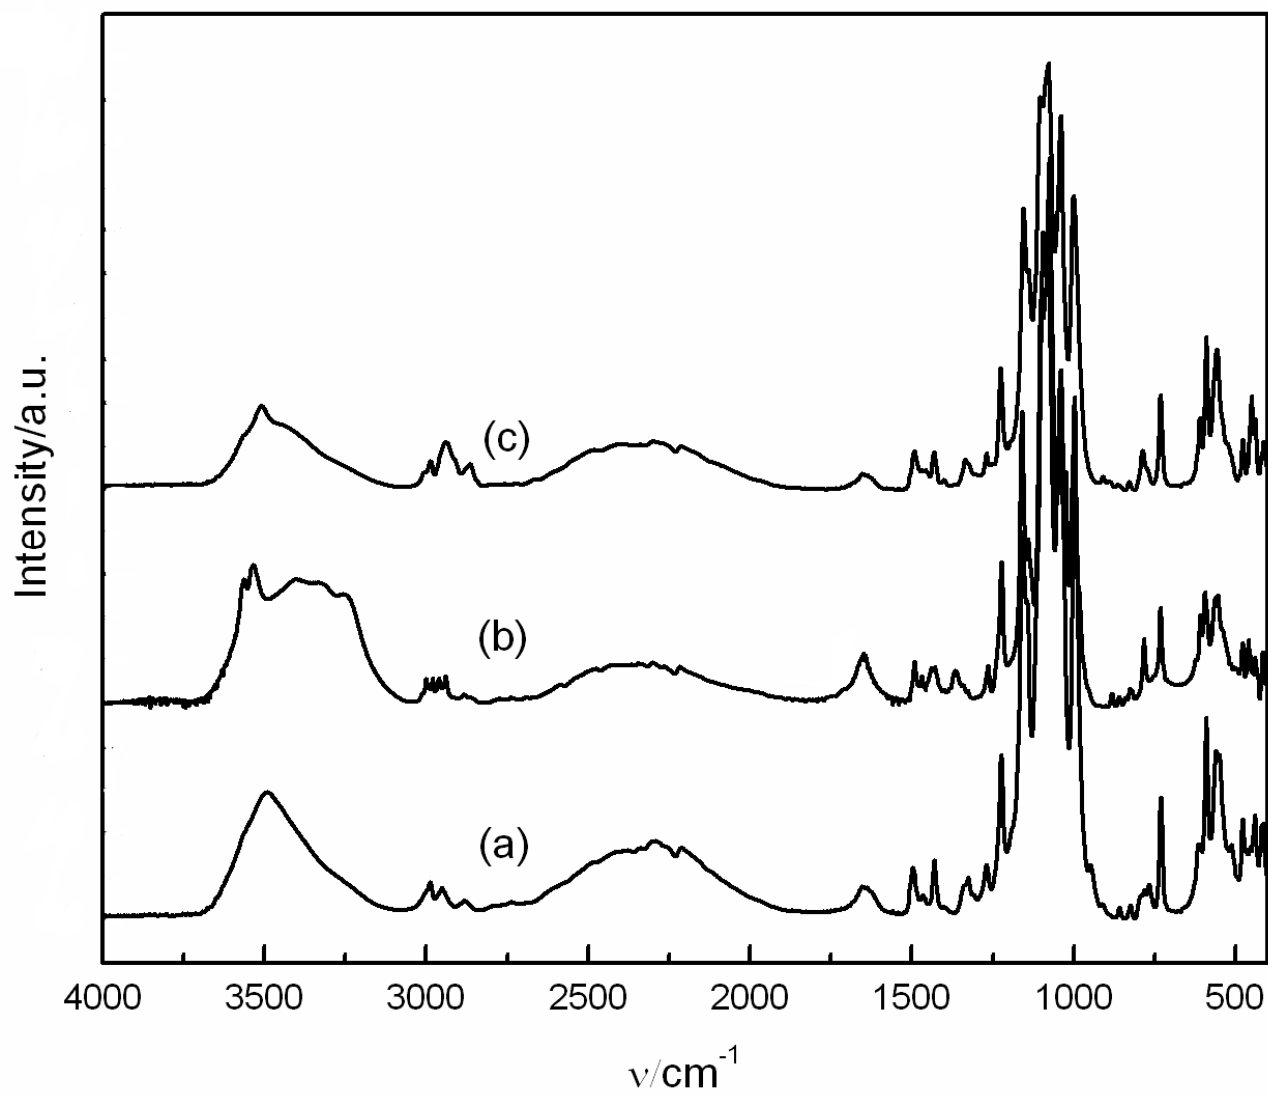

Figure S1: FT-IR spectra of ZC3 (a), ZC4 (b), and ZC5 (c).
